# Supplementary material
Source: PubMed Central journal article supplement (PMC4479341)

| Species | Number of palmitoylation(s) | Number of artificial modification(s) | Q1 <i>m/z</i> | Q3 <i>m/z</i> | Collision energy (V) |
|---------|-----------------------------|--------------------------------------|---------------|---------------|----------------------|
| Mouse   | 0                           | 0                                    | 946.2         | 320.2         | 26                   |
|         |                             | 1                                    | 950.0         | 335.2         | 34                   |
|         |                             | 2                                    | 953.7         | 350.2         | 34                   |
|         | 1                           | 0                                    | 1005.8        | 320.2         | 30                   |
|         |                             | 1                                    | 1009.6        | 335.2         | 34                   |
|         |                             | 2                                    | 1013.3        | 350.2         | 38                   |
|         | 2                           | 0                                    | 1065.4        | 320.2         | 30                   |
|         |                             | 1                                    | 1069.2        | 335.2         | 36                   |
|         |                             | 2                                    | 1072.9        | 350.2         | 38                   |
| Cow     | 0                           | 0                                    | 892.9         | 320.2         | 24                   |
|         |                             | 1                                    | 896.7         | 335.2         | 30                   |
|         |                             | 2                                    | 900.4         | 350.2         | 26                   |
|         | 1                           | 0                                    | 952.5         | 320.2         | 26                   |
|         |                             | 1                                    | 956.3         | 335.2         | 34                   |
|         |                             | 2                                    | 960.0         | 350.2         | 30                   |
|         | 2                           | 0                                    | 1012.1        | 320.2         | 26                   |
|         |                             | 1                                    | 1015.9        | 335.2         | 34                   |
|         |                             | 2                                    | 1019.6        | 350.2         | 26                   |

Supplemental table. Selected reaction monitoring transition list for SP-C analysis

### **Supplemental figure legends**

Figure S1. MS<sup>2</sup> analysis of palmitoylated mSP-C with different artificial modifications. MS<sup>2</sup> analyses of the indicated parent ions were performed. The y-series ions are consistent with the artificial modifications (oxidation and/or methylation) and the b-series ions are consistent with the palmitoylation status.

Figure S2. Analysis of mSP-C in bronchoalveolar lavage fluid. Bronchoalveolar lavage fluid from mice was analyzed as in Fig. 3C. All the SRM channels are shown. Only dipalmitoylated mSP-C is detected.

# Figure S1

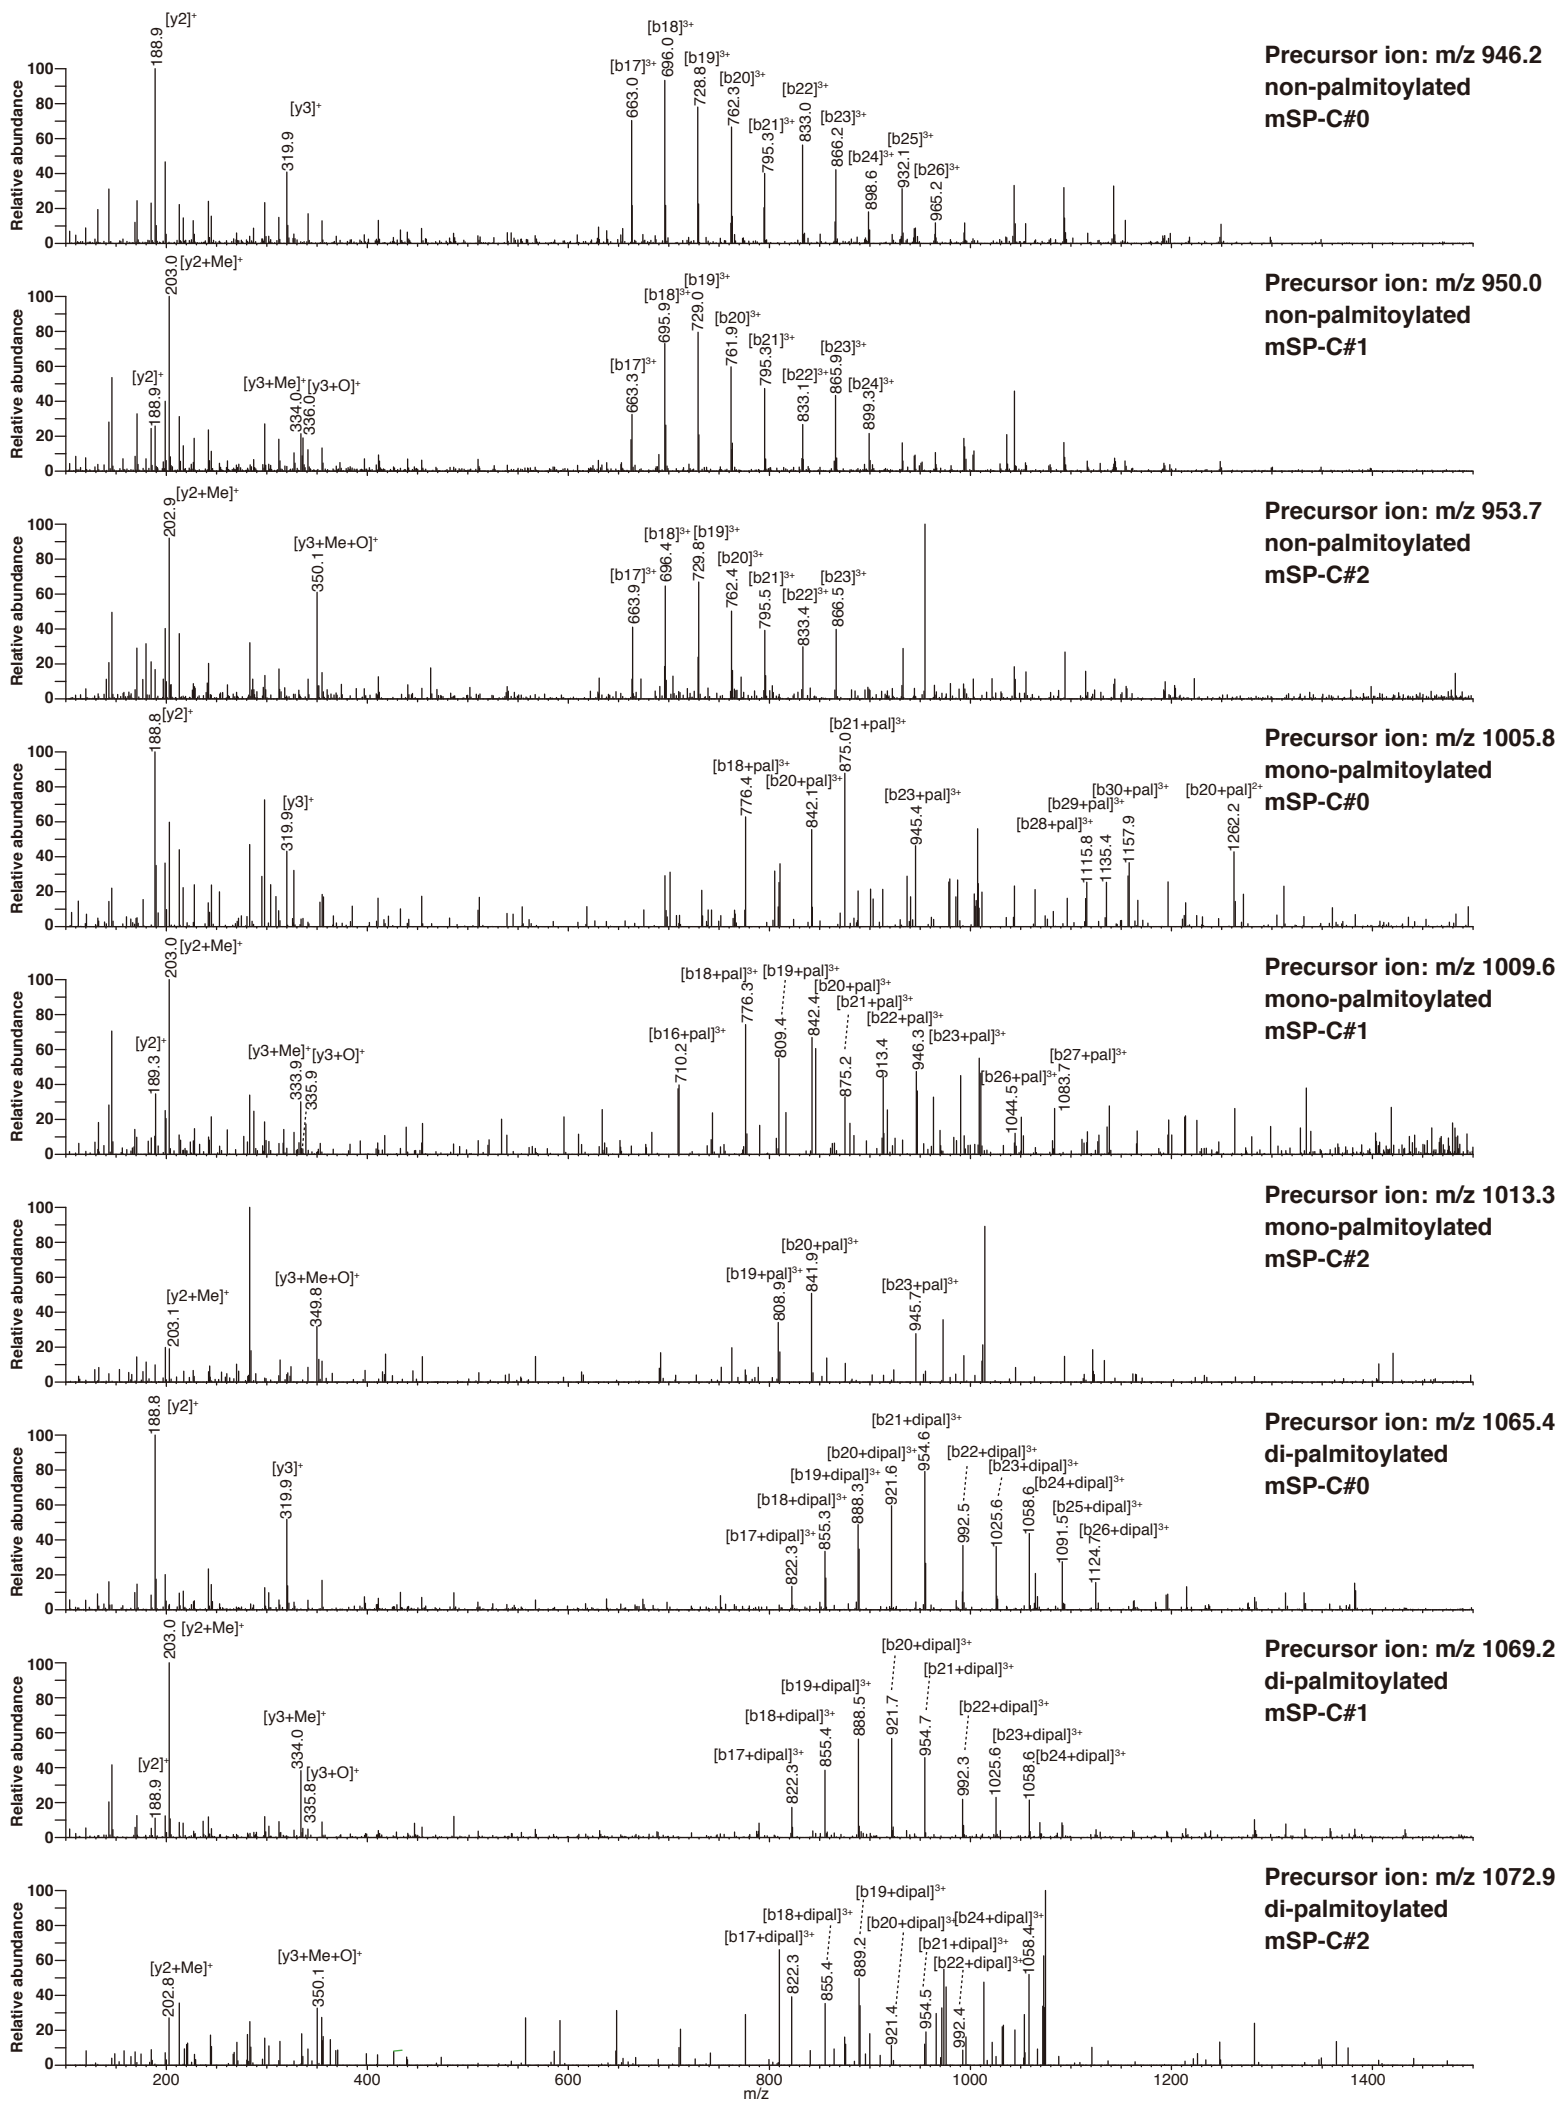

Figure S2

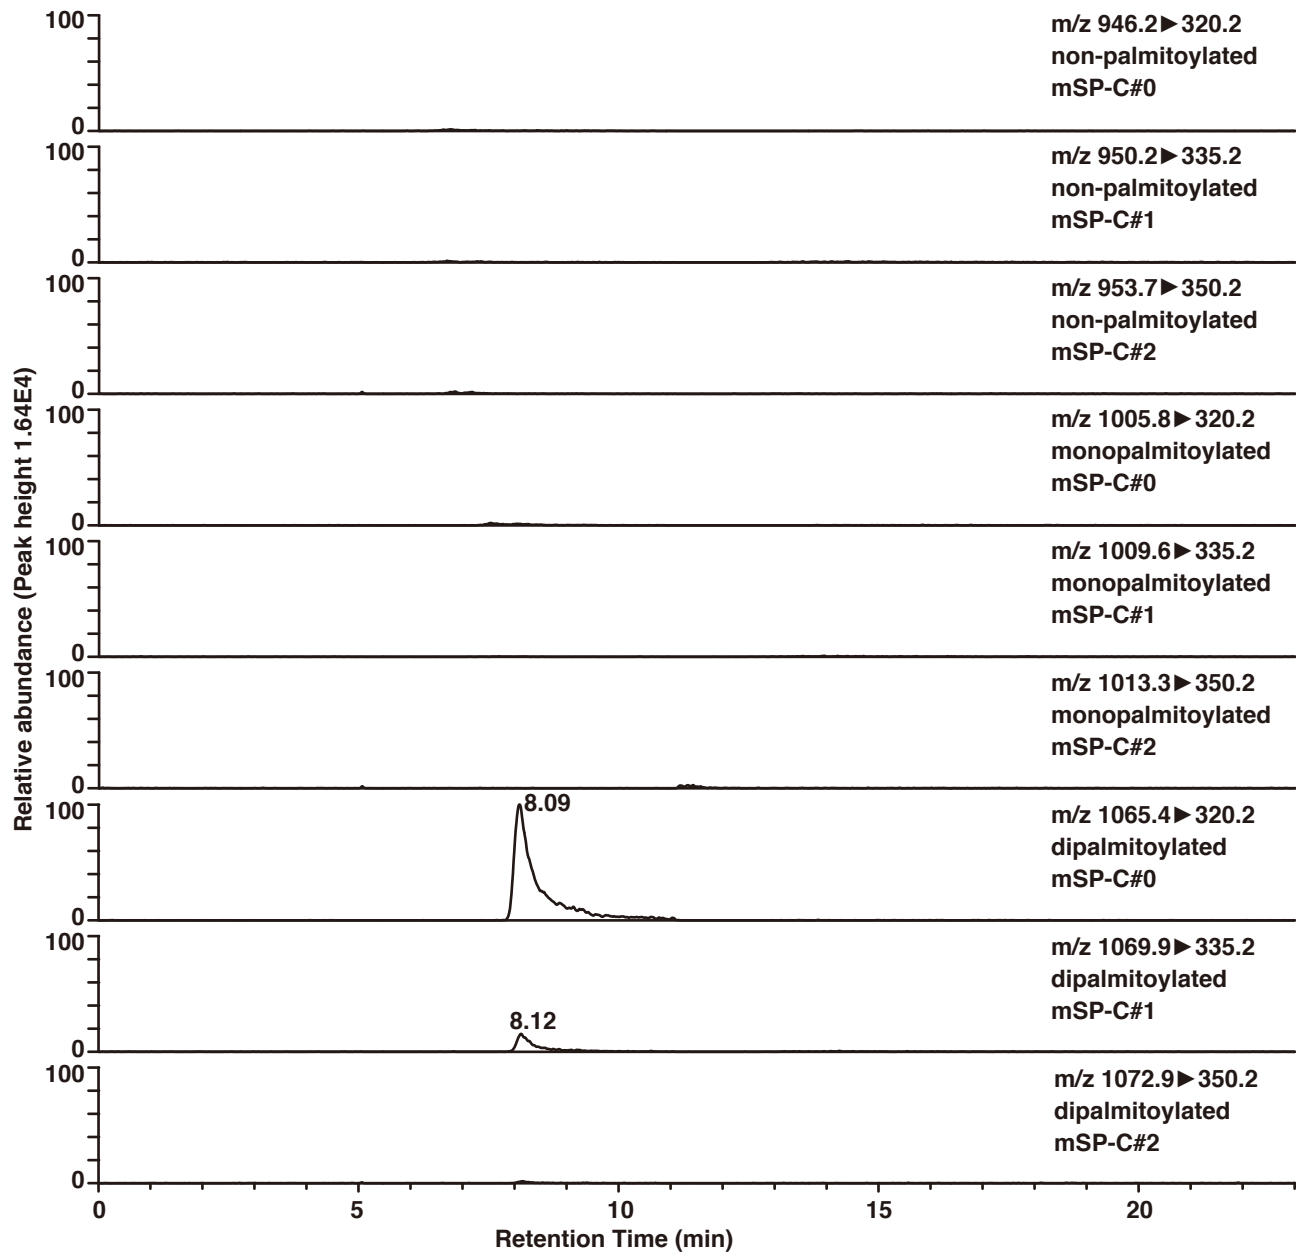

Supplement: supp_D060236_jlr.D060236-1.pdf [file supp_D060236_jlr.D060236-1.pdf]
